# Supplementary material for: Heterologous expression of Thermomyces lanuginosus lipase in Aspergillus niger: enzyme characterization, optimization of fermentation conditions and transcriptomic analysis
Source: Research Square preprint supplement (doi:10.21203/rs.3.rs-7832919/v1), 2025-10-28
Supplement: Supplementary file 1 [file 5b29b538fd6b69b44353a5ba.docx]

**Supplementary figures**


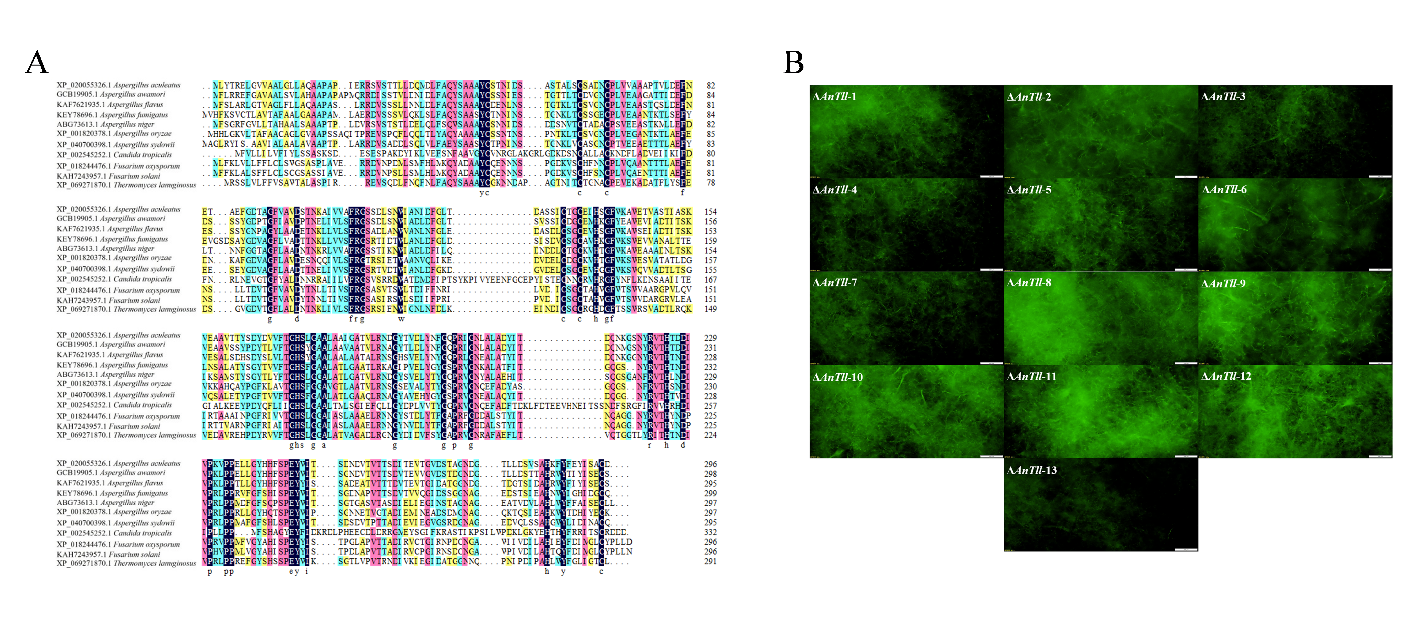


**Fig. S1.** **Analysis of multiple sequence alignment and eGFP expression.** (A)Alignment of lipase orthologs from various fungal species. Areas shaded in black are conserved regions (100% similarity), areas shaded in red are high degree similarity (more than 75% similarity), and shaded in yellow are middle degree similarity (more than 50% similarity), while unshaded areas are regions of variability. (B) Expression of TLL in Aspergillus niger were identified by observing the intensity of eGFP fluorescence. Bar = 200 µm.


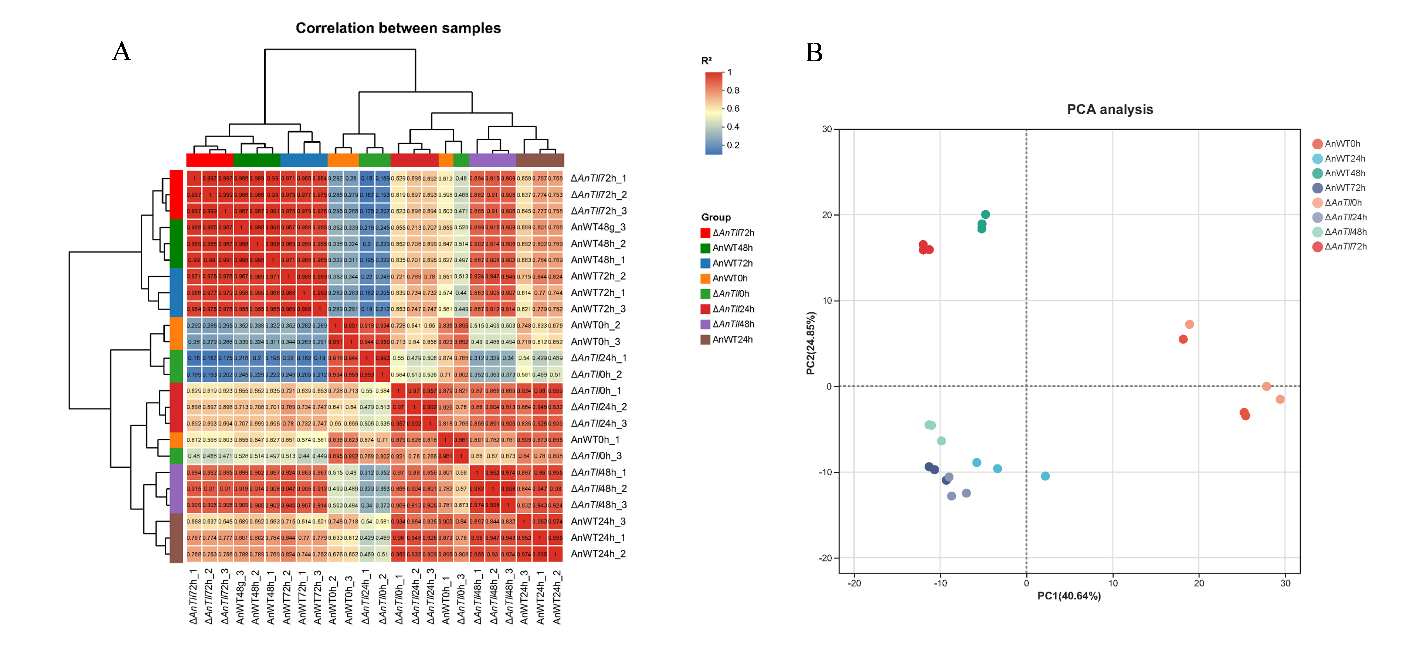


**Fig. S2 Pearson’s correlation coefficient analysis and principal component analysis.** (A) Pearson’s correlation coefficient estimated for three biological samples at each time point. Spearman correlation coefficients were above 0.952 and 0.957 for WTand Δ*AnTll*-11, respectively. (B) PCA of WT and Δ*AnTll*-11 strains was performed on three biological samples at each time point.


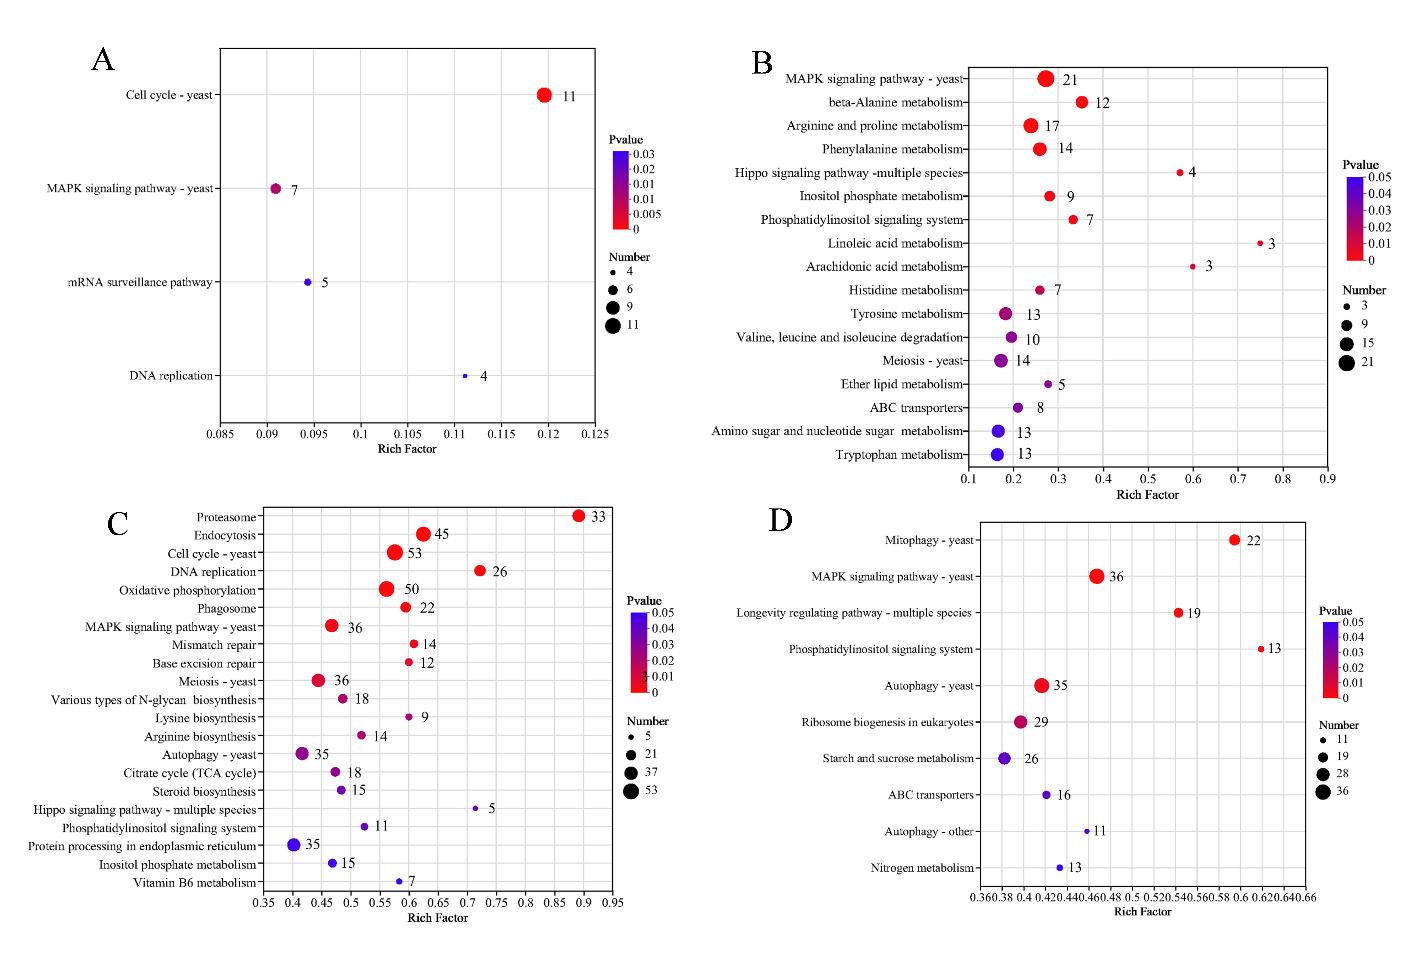


**Fig. S3.** **Perform KEGG enrichment analysis on the down-regulated DEGs between the wild-type strain and the ΔAnTll-11 strain.** (A) At 0 h, all 27 downregulated DEGs were significantly enriched in 4 KEGG pathways (*P* < 0.05). (C) At 24 h, all 173 downregulated DEGs were significantly enriched in 17 KEGG pathways (*P* < 0.05). (D) At 48 h, all 509 downregulated DEGs were significantly enriched in 21 KEGG pathways (*P* < 0.05). (E) At 72 h, all 239 downregulated DEGs were significantly enriched in 12 KEGG pathways (*P* < 0.05).


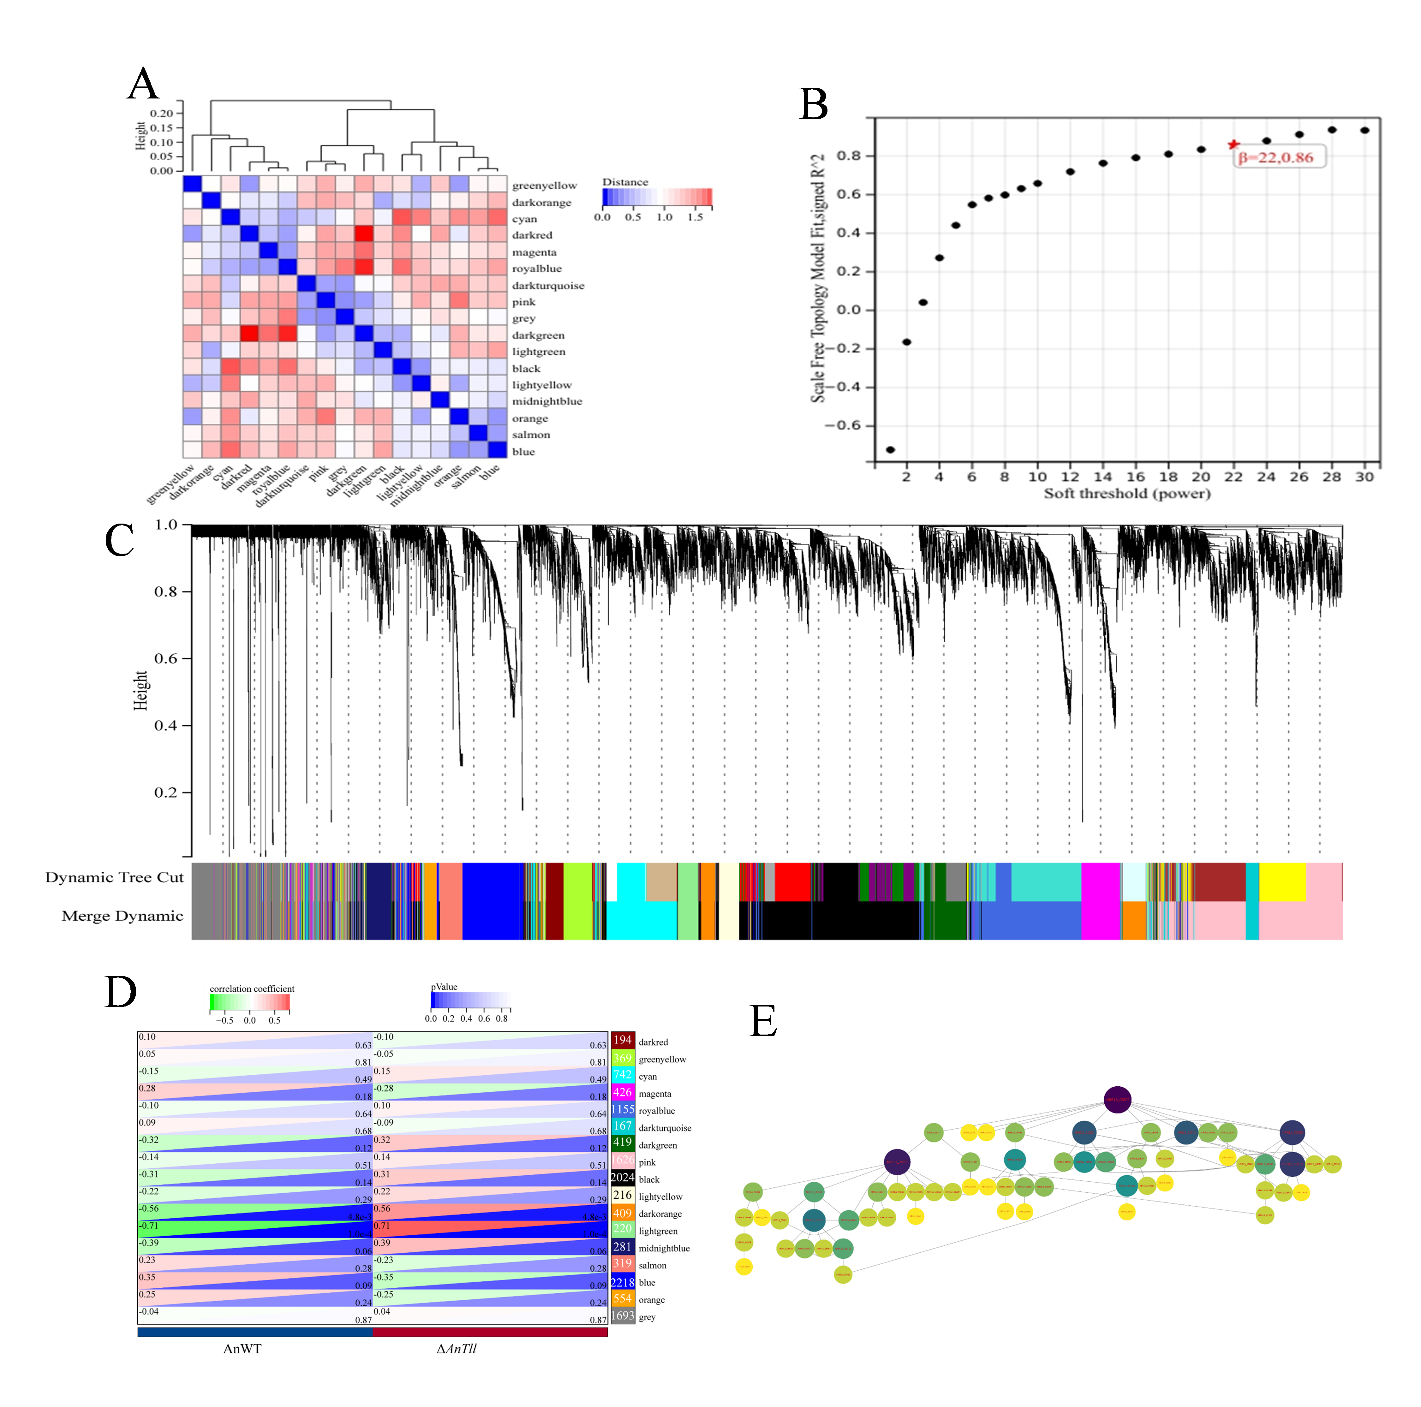


**Fig. S4.** **Weighted gene Co-expression network analysis (WGCNA) of wild-type (WT) and Δ*AnTll*-11 strains.** (A) Analyze pairwise correlations among all genes using Pearson correlation matrices combined with average clustering. Explore interactions between modules via clustering trees and correlation heatmaps. Perform clustering analysis on differentially expressed genes to obtain 17 modules. (B) Identify optimal soft thresholding parameters. Parameter β serves as the soft thresholding parameter, enhancing strong correlations while suppressing weak ones. Index 22 was selected, yielding *R*² = 0.87. (C) Clustering Dendrogram: Constructed a co-expression network based on the optimal soft threshold. Genes were assigned to distinct modules via hierarchical clustering analysis, generating a clustering dendrogram. The upper section displays the hierarchical clustering dendrogram of genes, while the lower section shows gene modules. Corresponding vertically, genes with closer distances (clustered on the same branch) were assigned to the same module. Merge represents the color after merging similar modules. Each color denotes a module, while gray indicates genes belonging to no module. (D) Based on the topological overlap matrix, a correlation heatmap between genes can be generated. Darker colors indicate stronger interactions between genes. The MElightgreen module exhibits the highest correlation (*R*² = 0.71). (E) The MElightgreen module network is visualized using Cytoscape. Core genes are identified based on key modules: A key module network is constructed based on gene similarity within these modules, and gene interactions within the network are visualized using Cytoscape.
